# Supplementary material
Source: publisher figshare collection journal article supplement (https://karger.figshare.com/ndownloader/files/13059347)
Supplement: Supplementary file 1 [file 13059347]

**Supplementary table 2: Other or rare causes of liver failure in the ALF subgroup.**

| **Cause for liver failure** | **ALF**  **(overall n = 131)** |
| --- | --- |
| Amanita toxin poisoning | 3 |
| Morbus Wilson | 3 |
| HELLP Syndrome | 1 |
| Amphetamine abuse | 1 |
| MDMA abuse | 1 |
| Amphetamine and MDMA abuse | 1 |
| Total | 10 |
